# Supplementary material
Source: HighWire-hosted journal article supplement (https://jpet.aspetjournals.org/highwire/filestream/146132/field_highwire_adjunct_files/0/259390SupplData.pdf)
Supplement: 259390SupplData.pdf [file 259390SupplData.pdf]

**Newly-developed dopamine D<sub>3</sub> receptor antagonists, R-VK4-40 and R-VK4-116, do not potentiate cardiovascular effects of cocaine or oxycodone in rats**

Chloe J. Jordan\*, Bree A. Humburg, Eric B. Thorndike, Anver Basha Shaik, Zheng-Xiong Xi, Michael H. Baumann, Amy Hauck Newman, Charles W. Schindler\*

CJJ, BAH, ABS, ZXX, AHN: Molecular Targets and Medications Discovery Branch, National Institute on Drug Abuse, Intramural Research Program, Baltimore, MD, United States

CWS, MHB: Designer Drug Research Unit, Intramural Research Program, National Institute on Drug Abuse, Baltimore, MD, United States

CWS, EBT: Preclinical Pharmacology Section, Intramural Research Program, National Institute on Drug Abuse, Baltimore, MD, United States

**Corresponding authors:** Chloe J. Jordan, Ph.D., 251 Bayview Blvd., Baltimore, MD 21224, Phone: 443-740-2586; Email: [chloe.jordan@nih.gov](mailto:chloe.jordan@nih.gov); Charles W. Schindler, Ph.D., 251 Bayview Blvd., Baltimore, MD 21224, Phone: 443-740-2520; Email: [CSCHIND@intra.nida.nih.gov](mailto:CSCHIND@intra.nida.nih.gov)

## Supplementary Materials

### Results

#### *R-VK4-40 and R-VK4-116 interactions with oxycodone and cocaine*

Figure S1 shows time courses of the interactions between *R*-VK4-40 (20 mg/kg, i.p.), *R*-VK4-116 (25 mg/kg, i.p., each administered 30 min prior to telemetry sessions) or oxycodone alone (1 mg/kg, i.p.) on blood pressure, heart rate, locomotor activity and body temperature. Compared to oxycodone alone, the combination of *R*-VK4-40 with oxycodone reduced blood pressure at the 10 – 30 min time points, as well as 50, 70, and 90 min time points, and reduced heart rate at all time points ( $p < 0.05$ ). The combinations of *R*-VK4-40 and *R*-VK4-116 with oxycodone also reduced body temperature compared to oxycodone alone at all time points ( $p < 0.05$ ).

Figure S2 shows time courses of the interactions between *R*-VK4-40 (20 mg/kg, i.p.), *R*-VK4-116 (25 mg/kg, i.p., each administered 30 min prior to telemetry sessions) or cocaine alone (10 mg/kg, i.p.) on blood pressure, heart rate, locomotor activity and body temperature. Compared to cocaine alone, the combination of *R*-VK4-40 with cocaine reduced blood pressure at the 10 – 30 min time points, as well as 50 - 60 min time points, reduced heart rate at all time points with the exception of the last 20 minutes of the session, and reduced activity from 40 – 110 minutes ( $p < 0.05$ ). The combination of *R*-VK4-116 with cocaine reduced heart rate compared to cocaine alone during the first 10 min of the session ( $p < 0.05$ ). The combinations of *R*-VK4-40 and *R*-VK4-116 with cocaine also reduced body temperature compared to cocaine alone at nearly all time points ( $p < 0.05$ ).

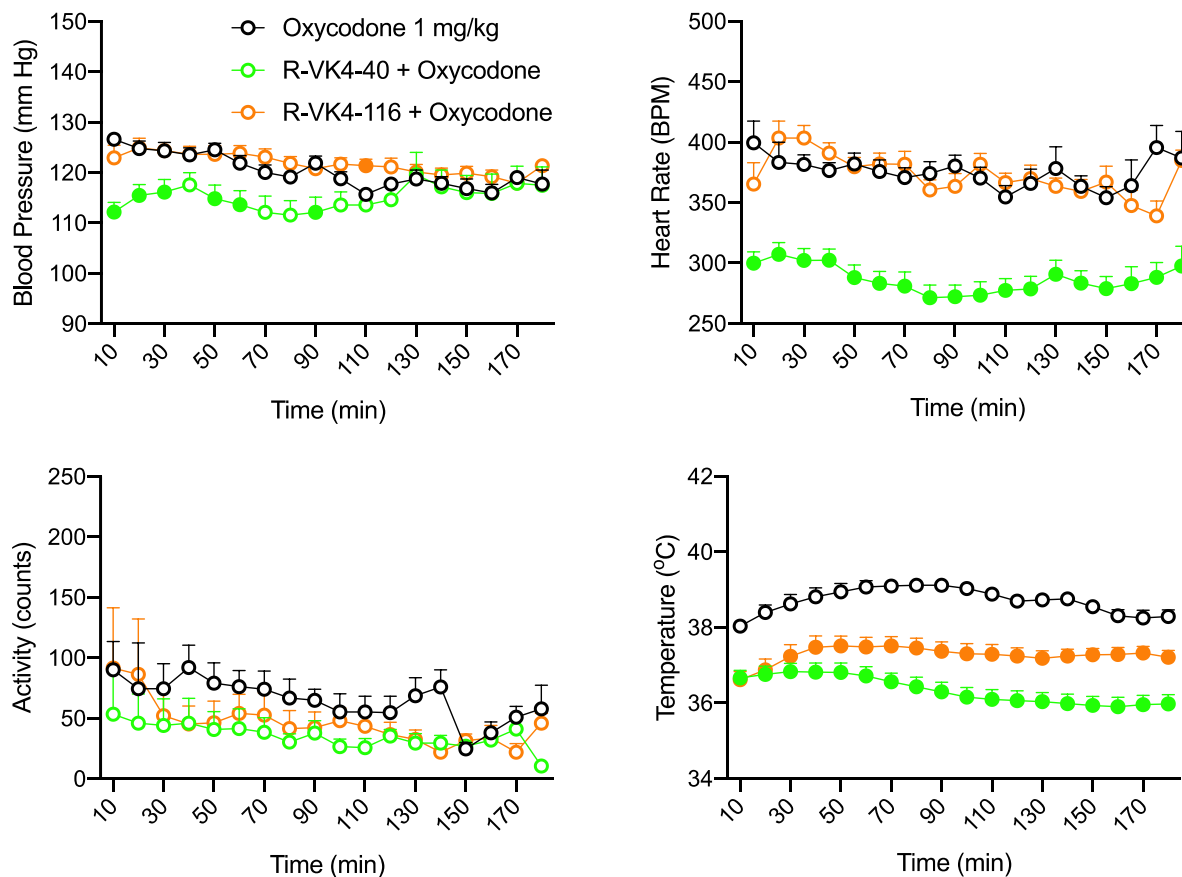

**Figure S1.** Time course data showing effects of oxycodone alone (1 mg/kg, i.p.) or *R*-VK4-40 (20 mg/kg, i.p.) and *R*-VK4-116 (25 mg/kg, i.p.; both administered 30 min prior to telemetry session) in the presence of oxycodone (1 mg/kg, i.p.) on blood pressure (mean arterial pressure), heart rate (beats per minute), activity levels and body temperature. Filled symbols represent statistically significant differences from oxycodone alone ( $p < 0.05$ ).

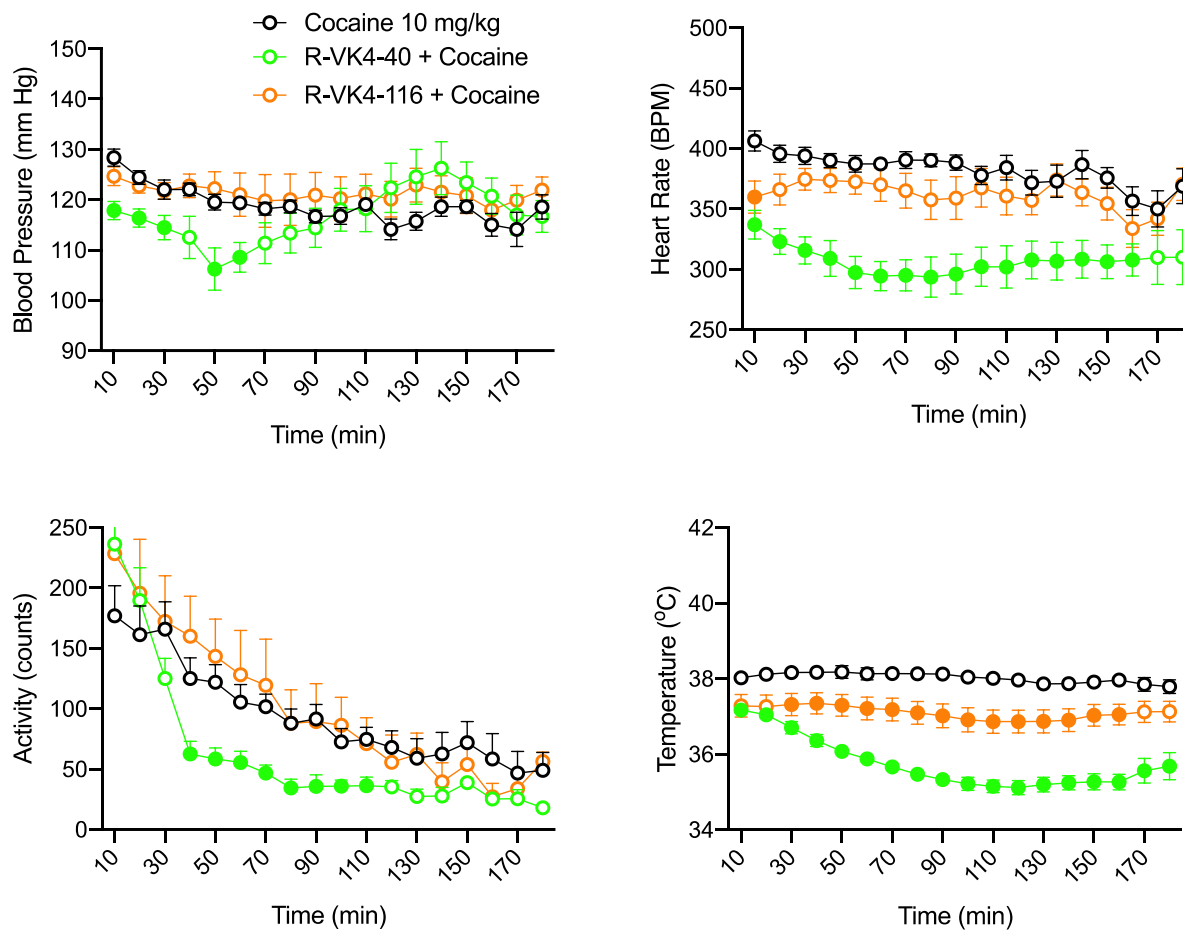

**Figure S2.** Time course data showing effects of cocaine alone (10 mg/kg, i.p.) or *R*-VK4-40 (20 mg/kg, i.p.) and *R*-VK4-116 (25 mg/kg, i.p.; both administered 30 min prior to telemetry session) in the presence of cocaine (10 mg/kg, i.p.) on blood pressure (mean arterial pressure), heart rate (beats per minute), activity levels and body temperature. Filled symbols represent statistically significant differences from cocaine alone ( $p < 0.05$ ).
